# Supplementary material for: Impacts of Climate Change and Anthropogenic Activities on Vegetation Dynamics Considering Time Lag and Accumulation Effects: A Case Study in the Three Rivers Source Region, China
Source: MDPI journal article supplement (doi:10.3390/su17062348), 2025-03-07
Supplement: s1 [file s1]

## Supplementary Material

### Impacts of Climate Change and Anthropogenic Activities on Vegetation Dynamics Considering Time-lag and accumulation Effects: A Case Study in the Three-River-Source Region, China

Yunfei Ma <sup>1,2,3,4</sup>, Xiaobo He <sup>1,2</sup>, Donghui Shangguan <sup>1,2,6,\*</sup>, Da Li <sup>1,2</sup>, Shuang Dai <sup>5</sup>, Beibei He <sup>1,2</sup> and Qin Yang <sup>1,2</sup>

<sup>1</sup> Key Laboratory of Cryosphere Science and Frozen Soil Engineering, Northwest Institute of Eco-Environment and Resources, Chinese Academy of Sciences, Lanzhou 730000, China; mayunfei@nieer.ac.cn; hxb@lzb.ac.cn; lida@lzb.ac.cn; hebeibei21@mailsucas.ac.cn

<sup>2</sup> University of Chinese Academy of Sciences, Beijing 101408, China

<sup>3</sup> Institute of Meteorological Sciences of Jilin Province, Changchun 130062, China

<sup>4</sup> Jilin Provincial Science and Technology Innovation Center of Agro-meteorological Disaster Risk Assessment and Prevention, Changchun 130062, China

<sup>5</sup> Jilin Business and Technology College, Changchun 130062, China; 20230023@jlbtc.edu.cn

<sup>6</sup> China-Pakistan Joint Research Centre on Earth Sciences, CAS-HEC, Islamabad 45320, Pakistan

\* Correspondence: dhguan@lzb.ac.cn

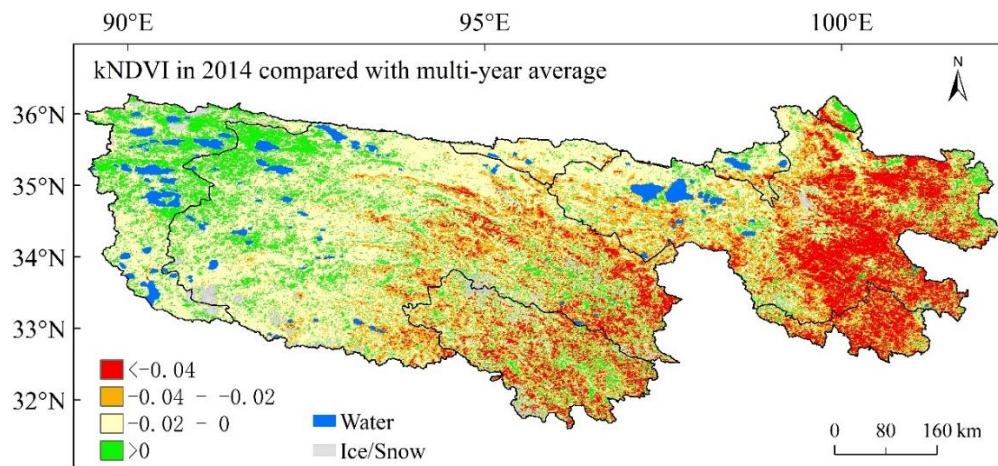

**Figure S1.** kNDVI in 2014 compared with multi-year average.

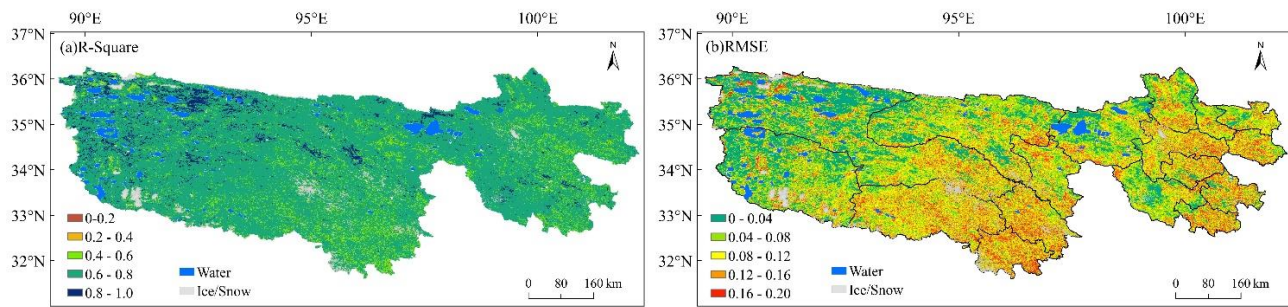

**Figure S2.** Performance of modified residual models:(a)  $R^2$ , (b)RMSE. The results indicated that incorporating time-lag and accumulation effects enhanced model performance.

**Table S1.** Comparison of vegetation dynamic data with other regions of the world.

| Regions                          | Vegetation Dynamics                                                                        | Sustainability in Future                                                                                                                                                                  | References |
|----------------------------------|--------------------------------------------------------------------------------------------|-------------------------------------------------------------------------------------------------------------------------------------------------------------------------------------------|------------|
| Three-River-Source Region, China | kNDVI showed fluctuation but an overall increasing trend                                   | the H fluctuated between 0.214 and 0.773, with an average of 0.593.The predominant future will likely continue in the same direction as the past 24 years                                 | This Study |
| Qinling-Daba Mountains ,China    | The kNDVI on the southern slope of the Qilian Mountains exhibits an overall positive trend | With an average of 0.5, the Hurst exponent fluctuated between 0.2 and 0.9, predominantly exhibiting anti-sustainability characteristics                                                   | [37]       |
| Sindh, Pakistan                  | an overall upward trend (annual 86.71% and growing season 82.7%)                           | The annual Hurst value was 0.65, indicates that there is an overall high consistency in the future vegetation trends                                                                      | [38]       |
| Nepal                            | 80% of the surface area (vegetation cover) showed an increasing vegetation trend           | The Hurst values ranged from 0.2 to 0.74. 68.02% of the total area was anticipated to follow the present pattern, whereas the NDVI trend is anticipated to converse in 31.98% of the area | [39]       |

**Table S2.** Model performance of different simultaneous time-lags and -accumulation period combinations.

| lag<br>(m) | accumulation<br>(n) | m + n | R <sup>2</sup> | RMSE | P value | Remark       |
|------------|---------------------|-------|----------------|------|---------|--------------|
| 0          | 0                   | 0     | 0.68           | 0.12 | <0.01   | L0A0         |
| 0          | 1                   | 1     | 0.62           | 0.19 | <0.01   | L0A1         |
| 1          | 0                   | 1     | 0.58           | 0.24 | <0.01   | L1A0         |
| 1          | 1                   | 2     | 0.59           | 0.22 | <0.01   | L1A1         |
| 2          | 0                   | 2     | 0.60           | 0.21 | <0.01   | L2A0         |
| 2          | 1                   | 3     | 0.66           | 0.14 | <0.01   | L2A1         |
| 1          | 3                   | 4     | 0.62           | 0.18 | 0.04    | m+n>3 (L1A3) |
| 2          | 2                   | 4     | 0.71           | 0.24 | 0.07    | m+n>3 (L2A2) |
| 3          | 1                   | 4     | 0.69           | 0.20 | 0.09    | m+n>3 (L3A1) |

Note: L denotes the time-lag effect, and A denotes the accumulation effect.
